# Supplementary material for: Lanthanide and Ladder-Structured Polysilsesquioxane Composites for Transparent Color Conversion Layers
Source: MDPI journal article supplement (doi:10.3390/ma16062537), 2023-03-22
Supplement: s1 [file s1]

# Supporting Information

## Lanthanide and Ladder-Structured Polysilsesquioxane Composites for Transparent Color Conversion Layers

Jaehyun Han <sup>1,2,†</sup>, Darya Burak <sup>1,3,†</sup>, Valeriia Poliukhova <sup>1</sup>, Albert S. Lee <sup>1</sup>, Hoseong Jang <sup>1,3</sup>, Seungsang Hwang <sup>1,3</sup>, Kyung-Youl Baek <sup>1,3</sup>, Joonsoo Han <sup>1</sup>, Byeong-Kwon Ju <sup>2,\*</sup> and So-Hye Cho <sup>1,3,\*</sup>

<sup>1</sup> Materials Architecturing Research Center, Korea Institute of Science and Technology, 5 Hwarang-ro 14-gil, Seongbuk-gu, Seoul 02792, Republic of Korea

<sup>2</sup> Display and Nanosystem Laboratory, College of Engineering, Korea University, Seoul 02841, Republic of Korea

<sup>3</sup> Department of Nanomaterial Science and Engineering, Korea University of Science and Technology, 217 Gajeong-ro, Yuseong-gu, Daejeon 34113, Republic of Korea

\* Correspondence: bkju@korea.ac.kr (B.-K.J.); sohyec@kist.re.kr (S.-H.C.)

† These authors contributed equally to this work.

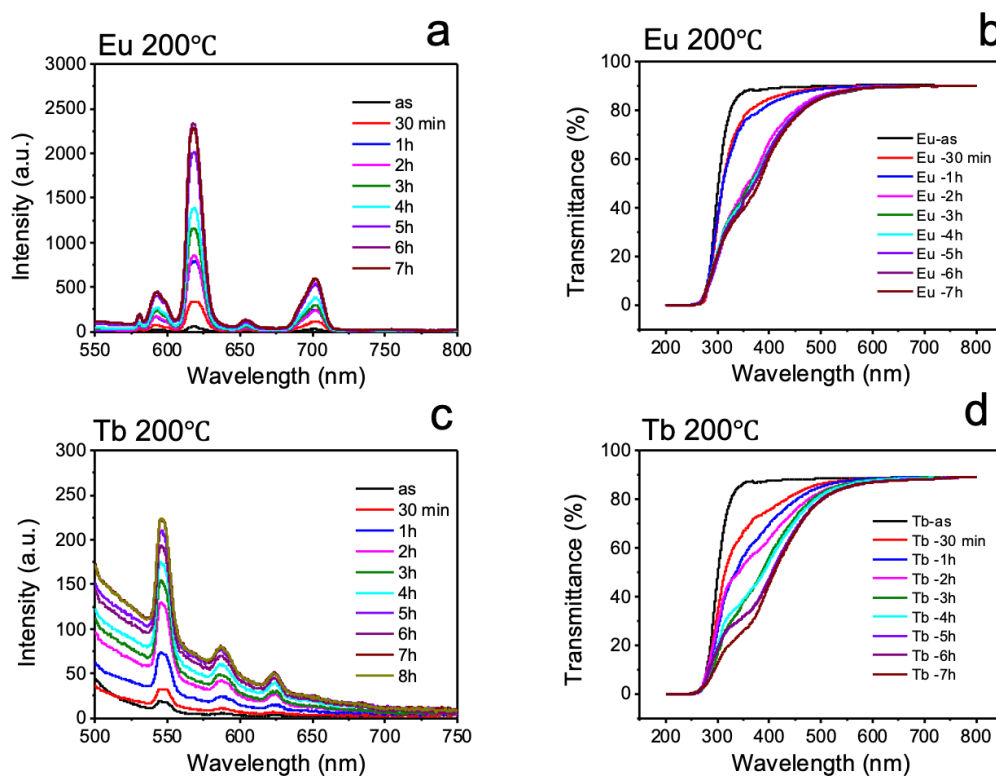

**Figure S1.** (a) PL luminescence and (b) transmittance of LPSQ64-Eu films cured at 200°C with different time duration (30 min – 7 hours); (c) PL luminescence and (d) transmittance of LPSQ64-Tb films cured at 200°C with different time duration (30 min – 7 hours).

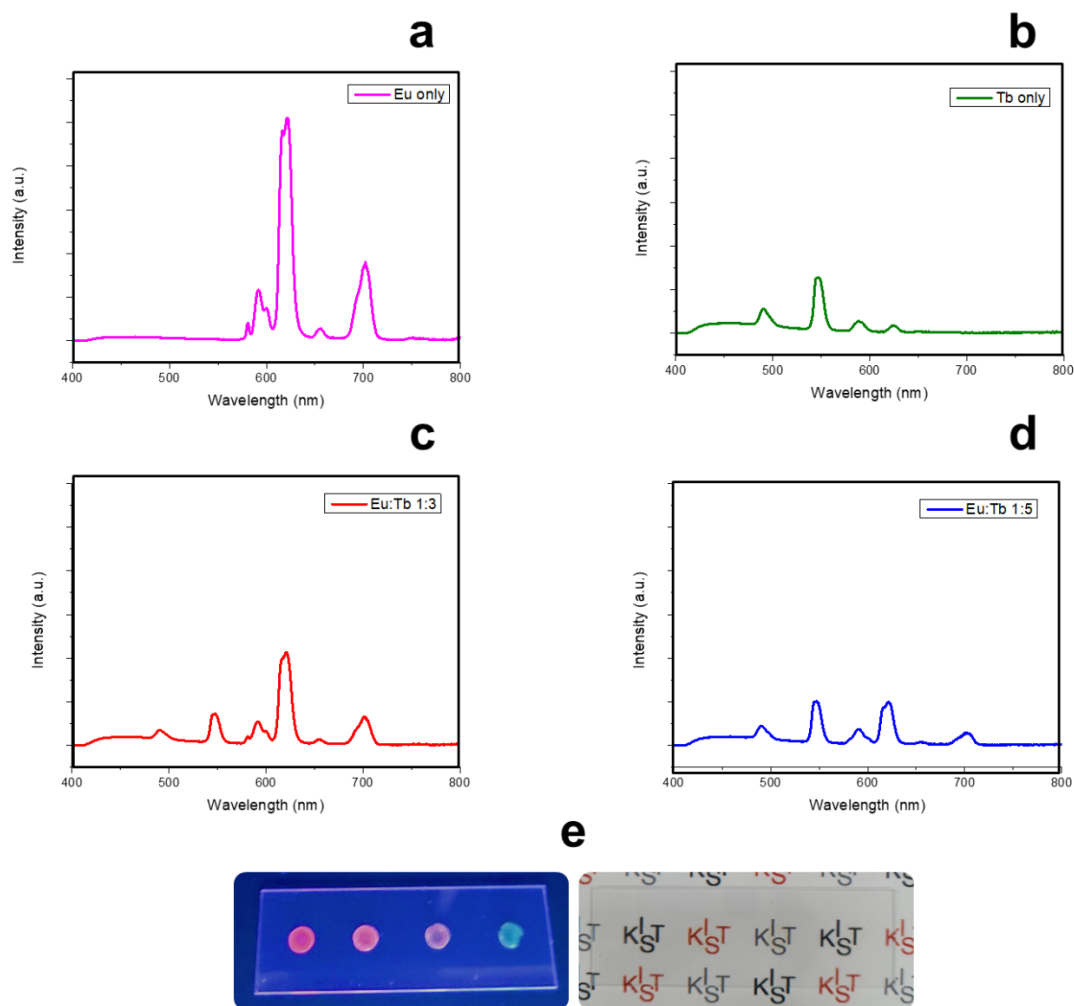

**Figure S2.** PL spectra of (a) LPGSQ64-Eu, (b) LPGSQ64-Tb, (c) LPGSQ64-Eu:Tb(1:3), and (d) LPGSQ64-Eu:Tb(1:5), cured at 180°C for 6 h, (e) circular thin films on a slide glass prepared by LPGSQ64-Eu, LPGSQ64-Eu:Tb(1:3), and LPGSQ64-Eu:Tb(1:5), and LPGSQ64-Tb, from left right. Photographs were taken under 365 nm UV light irradiation (left) and under natural light (right).

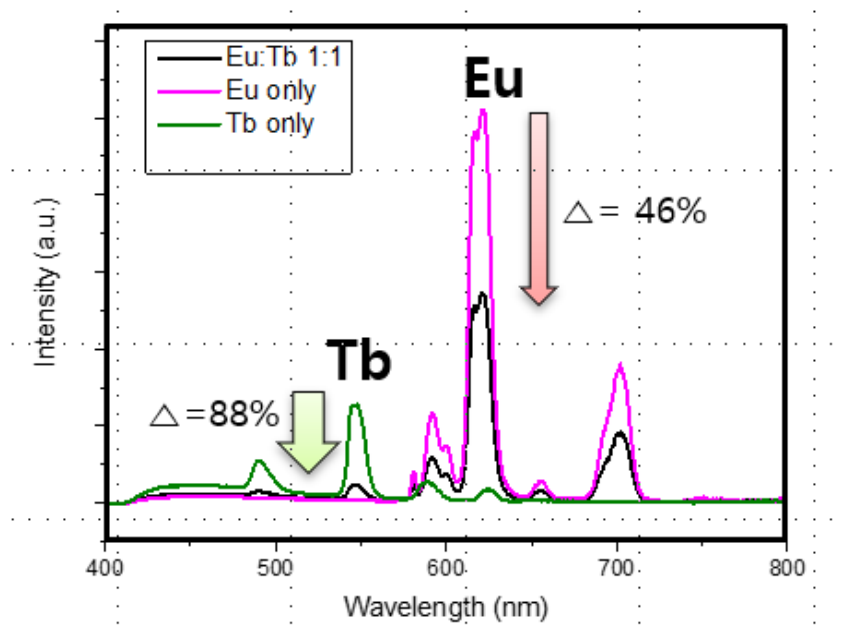

**Figure S3.** Superposed PL spectra of (a) LPGSQ64-Eu:Tb(1:1), (b) LPGSQ64-Eu, and (c) LPGSQ64-Tb are shown. The green arrow indicates an 88% reduction in the intensity of green luminescence, while the red arrow indicates a 46% reduction in the intensity of red luminescence.

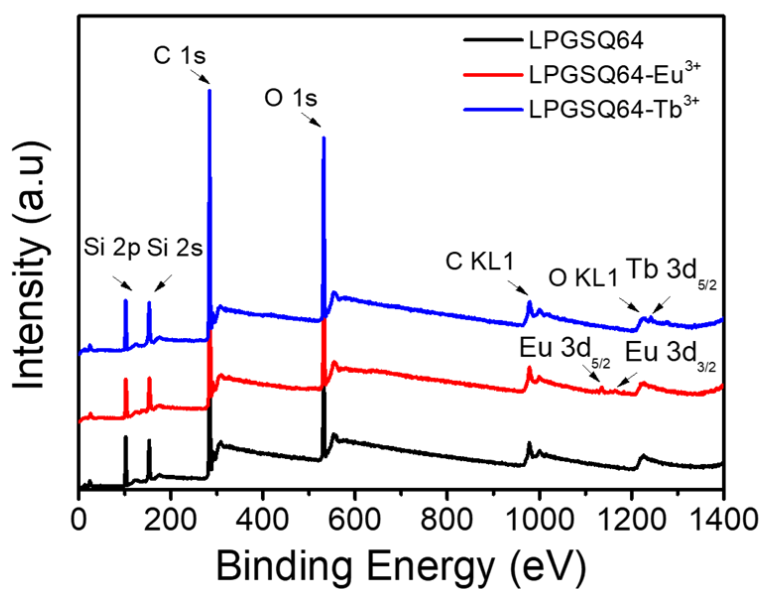

**Figure S4.** Wide-scan XPS spectra of LPGSQ64, LPGSQ64-Eu, and LPGSQ64-Tb.

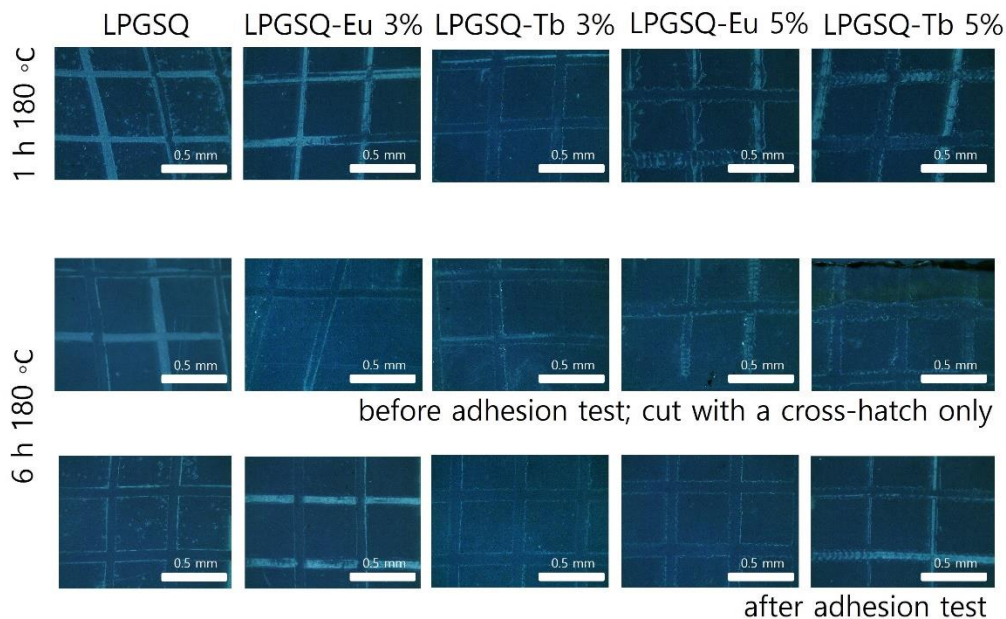

**Figure S5.** Microscope images of the 1 h and 6 h cured LPSQ64, LPSQ64-Eu films, and LPSQ64-Tb films with 3% and 5% doping after the cross-cut tape test. Additionally, images of the 6 h cured films cut by a cross-hatcher before undergoing the adhesion test are included.

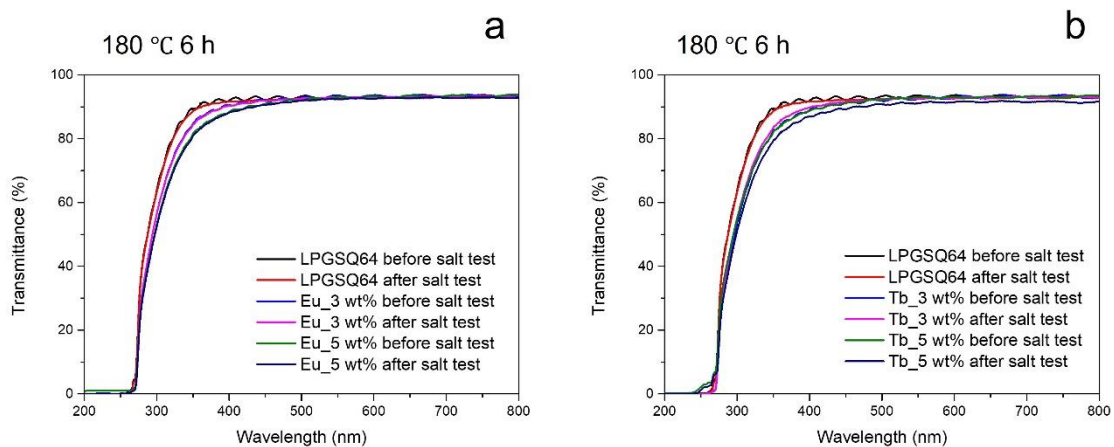

**Figure S6.** Transmittance of (a) LPSQ64 and LPSQ64-Eu films, and (b) LPSQ64 and LPSQ64-Tb films with 3% and 5% doping before and after the salt test.
